# Supplementary material
Source: HighWire-hosted journal article supplement (https://thorax.bmj.com/content/76/6/547)
Supplement: inline-supplementary-material-2 [file inline-supplementary-material-2.pdf]

**Supplementary Table S2.** Baseline characteristics of non-included girls and boys due to missing or extreme gestational age, by exposed and non-exposed to ACEs early in life, N = 14202.

| Characteristic                                         | GIRLS           |      |                      |      |                |                | BOYS            |      |                      |      |                |                |        |
|--------------------------------------------------------|-----------------|------|----------------------|------|----------------|----------------|-----------------|------|----------------------|------|----------------|----------------|--------|
|                                                        | Exposed (N=252) |      | Non-exposed (N=6769) |      | Total (N=7021) |                | Exposed (N=253) |      | Non-exposed (N=6928) |      | Total (N=7181) |                |        |
|                                                        | %               |      | %                    | %    |                | p <sup>#</sup> | %               |      | %                    | %    |                | p <sup>#</sup> |        |
| <b>Maternal age at delivery (years)</b>                |                 |      |                      |      |                |                |                 |      |                      |      |                |                |        |
| <25                                                    | 60              | 1.0  | 60                   | 23.8 | 1164           | 17.4           | 47              | 18.6 | 1147                 | 16.6 | 1194           | 16.6           |        |
| 25–34                                                  | 148             | 2.0  | 148                  | 58.7 | 4467           | 65.7           | 157             | 62.1 | 4607                 | 66.5 | 4764           | 66.3           |        |
| ≥35                                                    | 44              | 3.0  | 44                   | 17.5 | 1138           | 16.8           | 49              | 19.4 | 1174                 | 16.9 | 1223           | 17.0           | 0.3385 |
| <b>Parents highest educational level at conception</b> |                 |      |                      |      |                |                |                 |      |                      |      |                |                |        |
| Vocational education or below                          | 166             | 65.9 | 3711                 | 54.8 | 3877           | 55.2           | 158             | 62.5 | 3683                 | 53.2 | 3841           | 53.5           |        |
| Higher education                                       | 74              | 29.4 | 2762                 | 40.8 | 2836           | 40.4           | 79              | 31.2 | 2926                 | 42.2 | 3005           | 41.8           |        |
| Missing                                                | 12              | 4.8  | 296                  | 4.4  | 308            | 4.4            | 16              | 6.3  | 319                  | 4.6  | 335            | 4.7            | 0.0003 |
| <b>Maternal smoking during pregnancy</b>               |                 |      |                      |      |                |                |                 |      |                      |      |                |                |        |
| No                                                     | <=5             | 0    | <=33                 | 0    | 33             | 0.5            | <=5             | 0.0  | <=36                 | 0.0  | 36             | 0.5            |        |
| Yes                                                    | <=5             | 0    | <=21                 | 0    | 21             | 0.3            | 0               | 0.0  | 12                   | 0.0  | 12             | 0.2            |        |
| Missing                                                | 247             | 98.0 | 6720                 | 99.3 | 6967           | 99.2           | 250             | 0.0  | 6883                 | 0.0  | 7133           | 99.3           | 0.3017 |
| <b>Maternal place of living at delivery</b>            |                 |      |                      |      |                |                |                 |      |                      |      |                |                |        |
| Rural                                                  | 182             | 72.2 | 5550                 | 82.0 | 5732           | 81.6           | 18              | 7.1  | 540                  | 7.8  | 558            | 7.8            |        |
| Urban                                                  | 31              | 12.3 | 509                  | 7.5  | 540            | 7.7            | 197             | 77.9 | 5662                 | 81.7 | 5859           | 81.6           |        |
| Missing                                                | 39              | 15.5 | 710                  | 10.5 | 749            | 10.7           | 38              | 15.0 | 726                  | 10.5 | 764            | 10.6           | 0.8640 |
| <b>Parity</b>                                          |                 |      |                      |      |                |                |                 |      |                      |      |                |                |        |
| 1 <sup>st</sup>                                        | 109             | 43.3 | 3003                 | 44.4 | 3112           | 44.3           | 100             | 39.5 | 2967                 | 42.8 | 3067           | 42.7           |        |
| ≥2                                                     | 87              | 34.5 | 2381                 | 35.2 | 2468           | 35.2           | 99              | 39.1 | 2492                 | 36.0 | 2591           | 36.1           |        |
| Missing                                                | 56              | 22.2 | 1385                 | 20.5 | 1441           | 20.5           | 54              | 21.3 | 1469                 | 21.2 | 1523           | 21.2           | 0.2542 |
| <b>Calendar year of birth</b>                          |                 |      |                      |      |                |                |                 |      |                      |      |                |                |        |
| 1997–1999                                              | 145             | 57.5 | 4358                 | 64.4 | 4503           | 64.1           | 150             | 59.3 | 4481                 | 64.7 | 4631           | 64.5           |        |
| 2000–2002                                              | 65              | 25.8 | 1429                 | 21.1 | 1494           | 21.3           | 51              | 20.2 | 1506                 | 21.7 | 1557           | 21.7           |        |
| 2003–2004                                              | 42              | 16.7 | 982                  | 14.5 | 1024           | 14.6           | 52              | 20.6 | 941                  | 13.6 | 993            | 13.8           | 0.0069 |
| <b>Season of birth</b>                                 |                 |      |                      |      |                |                |                 |      |                      |      |                |                |        |
| Winter                                                 | 62              | 24.6 | 1742                 | 25.7 | 1804           | 25.7           | 60              | 23.7 | 1772                 | 25.6 | 1832           | 25.5           |        |
| Spring                                                 | 56              | 22.2 | 1512                 | 22.3 | 1568           | 22.3           | 45              | 17.8 | 1519                 | 21.9 | 1564           | 21.8           |        |
| Summer                                                 | 61              | 24.2 | 1513                 | 22.4 | 1574           | 22.4           | 68              | 26.9 | 1533                 | 22.1 | 1601           | 22.3           |        |
| Fall                                                   | 73              | 29.0 | 2002                 | 29.6 | 2075           | 29.6           | 80              | 31.6 | 2104                 | 30.4 | 2184           | 30.4           | 0.1833 |
| <b>Offspring asthma</b>                                |                 |      |                      |      |                |                |                 |      |                      |      |                |                |        |
| No asthma                                              | 220             | 87.3 | 6031                 | 89.1 | 6251           | 89.0           | 210             | 83.0 | 5748                 | 83.0 | 5958           | 83.0           |        |
| Asthma                                                 | 32              | 12.7 | 738                  | 10.9 | 770            | 11.0           | 43              | 17.0 | 1180                 | 17.0 | 1223           | 17.0           | 0.9880 |

<sup>#</sup>The p-values are computed using a chi-squared distribution.
